# Supplementary material
Source: MDPI journal article supplement (https://www.mdpi.com/2306-5729/7/9/123)
Supplement: s1 [file s1]

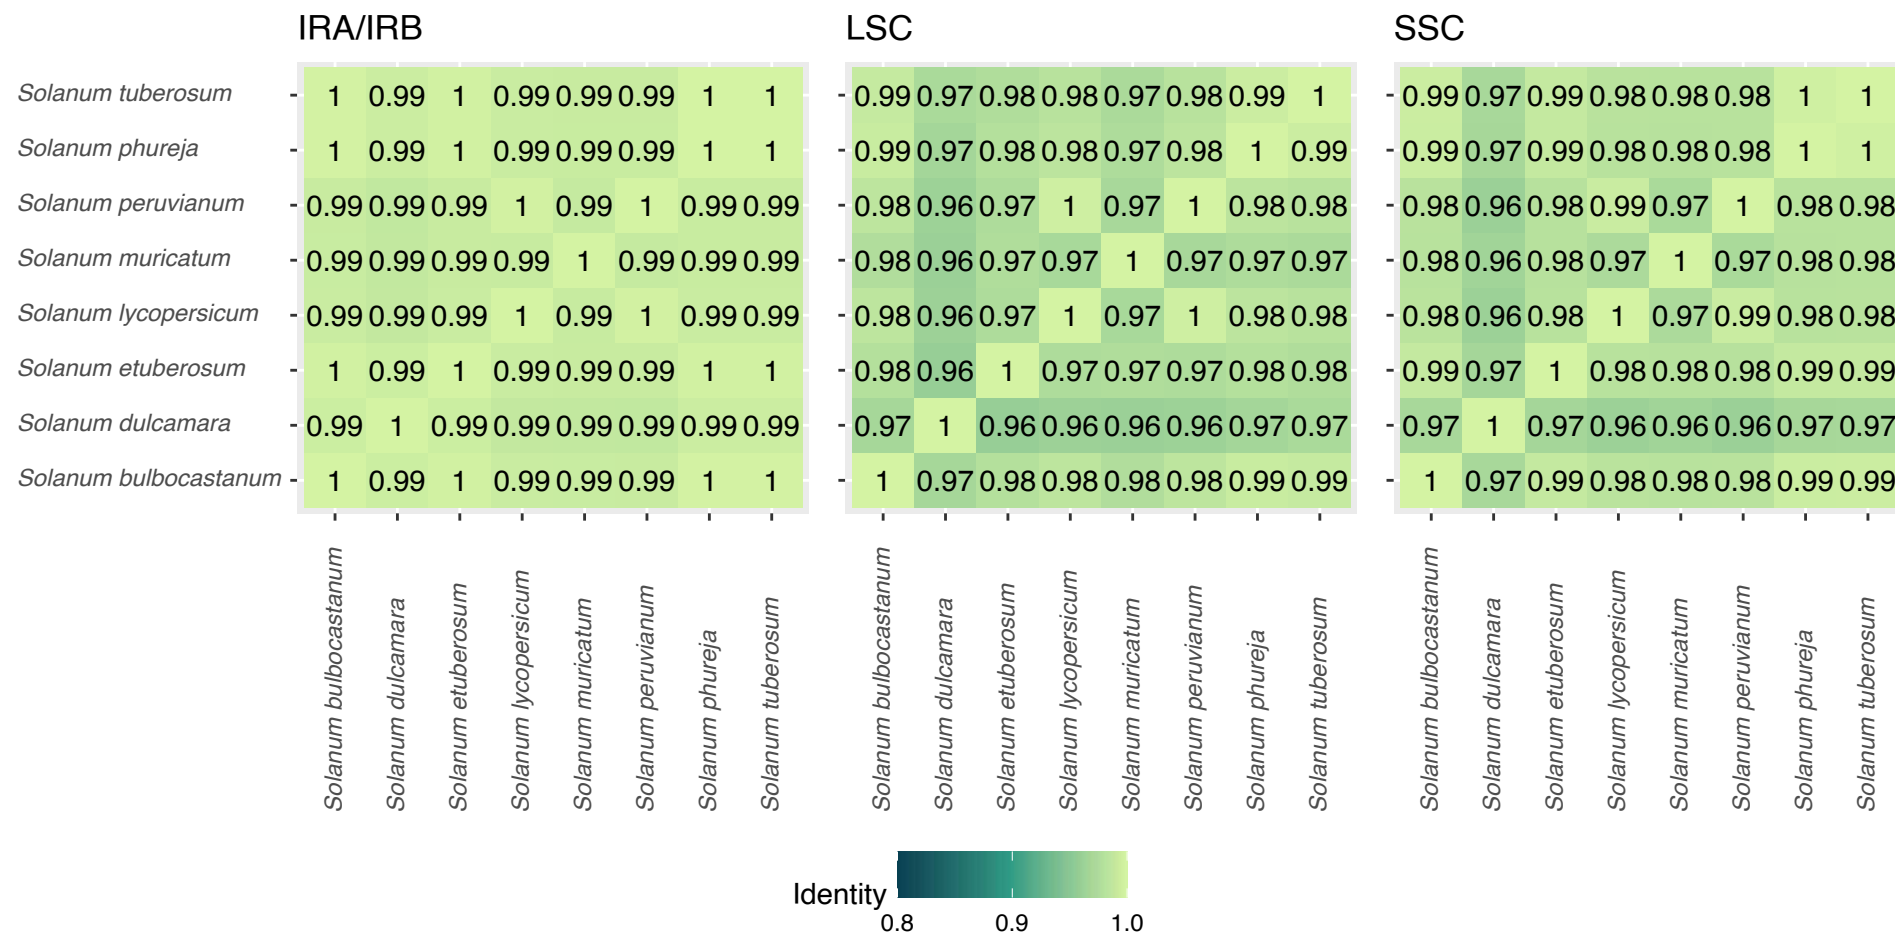

**Figure S1.** Genome structure comparison and location of microsatellites of the eight cp genomes, with *S. muricatum* as reference
