# Supplementary material
Source: MDPI journal article supplement (https://www.mdpi.com/2306-5729/7/9/123)

Microsatellite Motif

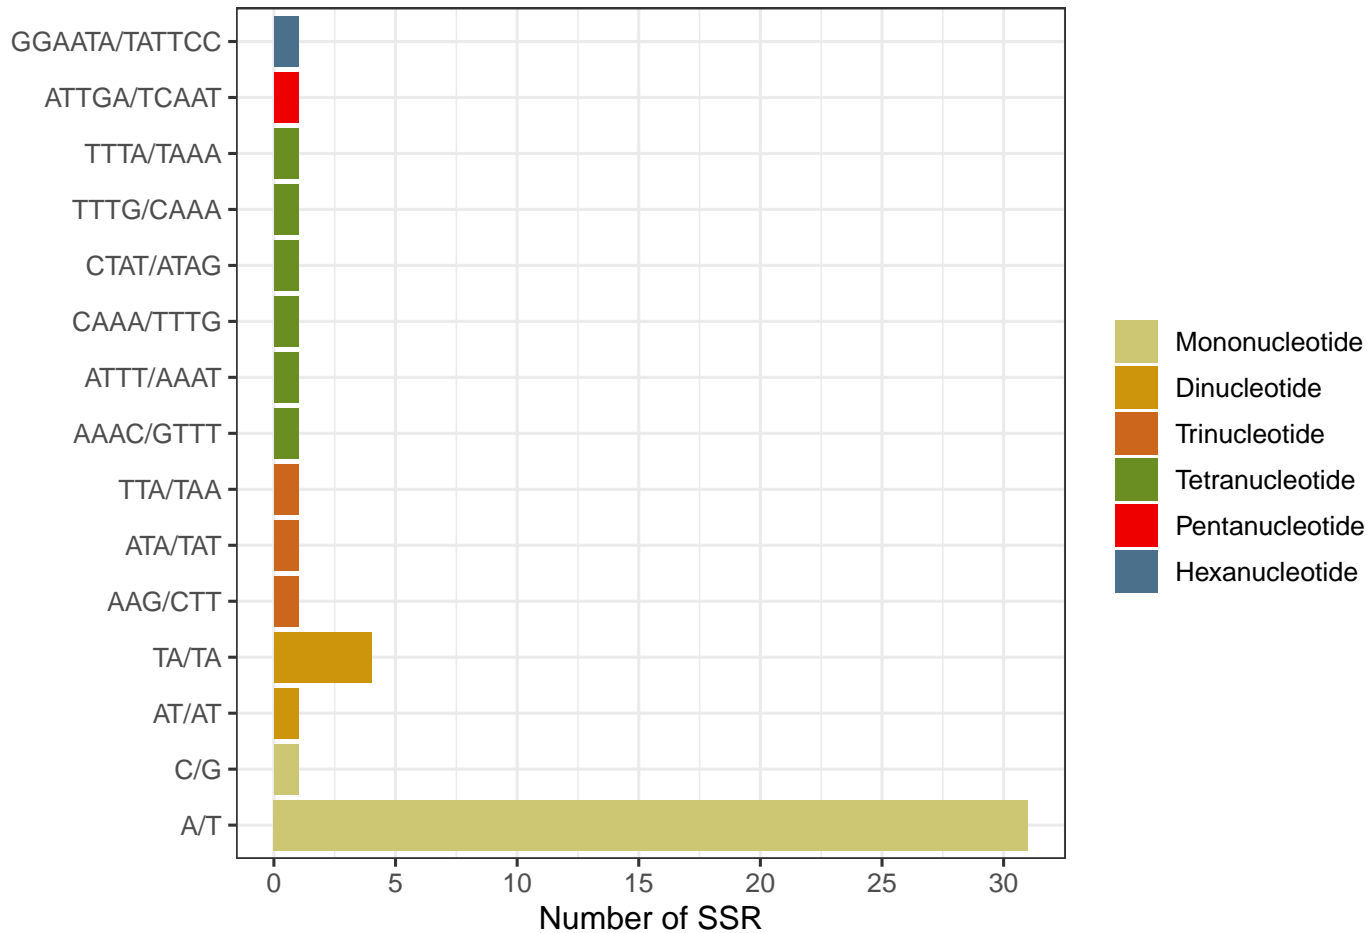

Supplement: s1 [file s1]
